# Supplementary material
Source: publisher figshare collection journal article supplement (https://asha.figshare.com/articles/dataset/_/21210893)
Supplement: Supplementary file 1 [file 1]

$$\text{PSI} = | \langle e^{i(n\theta_1 - m\theta_2)} \rangle |$$

**Supplemental Material S1.** Formula of cross-frequency phase synchronization index (PSI).
